# Supplementary material for: Global chromatin organizer SATB1 acts as a context-dependent regulator of the Wnt/Wg target genes
Source: PubMed Central journal article supplement (PMC7873079; doi:10.1038/s41598-021-81324-2), 2021-02-09
Supplement: 41598_2021_81324_MOESM1_ESM.pdf [file 41598_2021_81324_MOESM1_ESM.pdf]

## **Global chromatin organizer SATB1 acts as a context-dependent regulator of the Wnt/Wg target genes**

Praveena L Ramanujam<sup>1,2</sup>, Sonam Mehrotra<sup>1,2,3</sup>, Ram Parikshan Kumar<sup>4</sup>, Shreekant Verma<sup>4</sup>, Girish Deshpande<sup>5</sup>, Rakesh K. Mishra<sup>4,6</sup>, and Sanjeev Galande<sup>1,6</sup>

- 1- Centre of Excellence in Epigenetics, Department of Biology, Indian Institute of Science Education and Research, Pune 411008, India
- 2- These authors contributed equally
- 3- Advanced Centre for Treatment, Research and Education in Cancer, Kharghar, Mumbai, India
- 4- Centre for Cellular and Molecular Biology, Hyderabad, India
- 5- Department of Molecular Biology, Princeton University. Princeton NJ 08540, USA
- 6- Senior authors to whom correspondence should be addressed

Short Running Title: Context-dependent regulation of Wnt/Wg pathway by SATB1

Address for Correspondence:

Sanjeev Galande  
Centre of Excellence in Epigenetics  
Indian Institute of Science Education and Research  
Dr. Homi Bhabha Road, Pune 411008, India  
Tel: 91-20-25908060, Fax: 91-20-20251566  
email: sanjeev@iiserpune.ac.in

## Supplementary Information

## Supplementary Figure S1

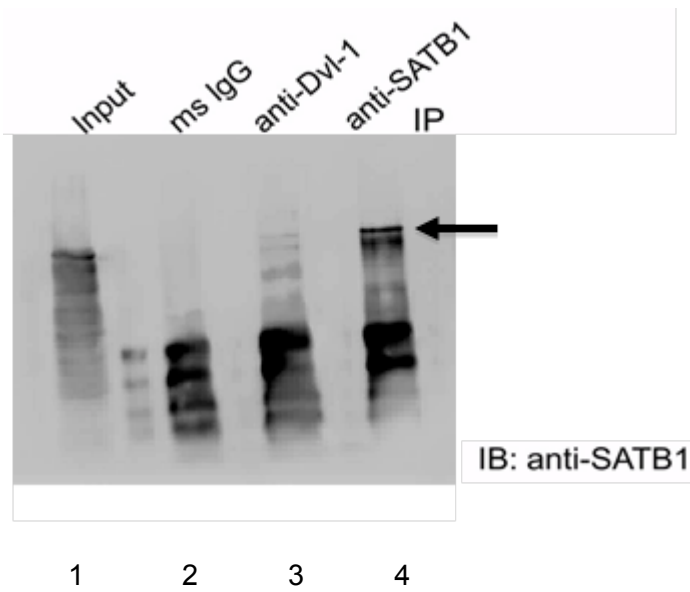

**Figure S1: Full blot for the coimmunoprecipitation assay.** Lane 1, input (5%). Lane 2, samples immunoprecipitated using mouse IgG and immunoblotted using the anti-SATB1 antibody. The signal between the ms IgG sample and input lanes is the overflow from the msIgG sample. Lane 3, samples immunoprecipitated using anti-Dvl-1 antibody and immunoblotted using the anti-SATB1 antibody. Lane 4 represents the positive control, wherein the samples immunoprecipitated using the anti-SATB1 antibody were immunoblotted using the anti-SATB1 antibody.

### Supplementary Figure S2

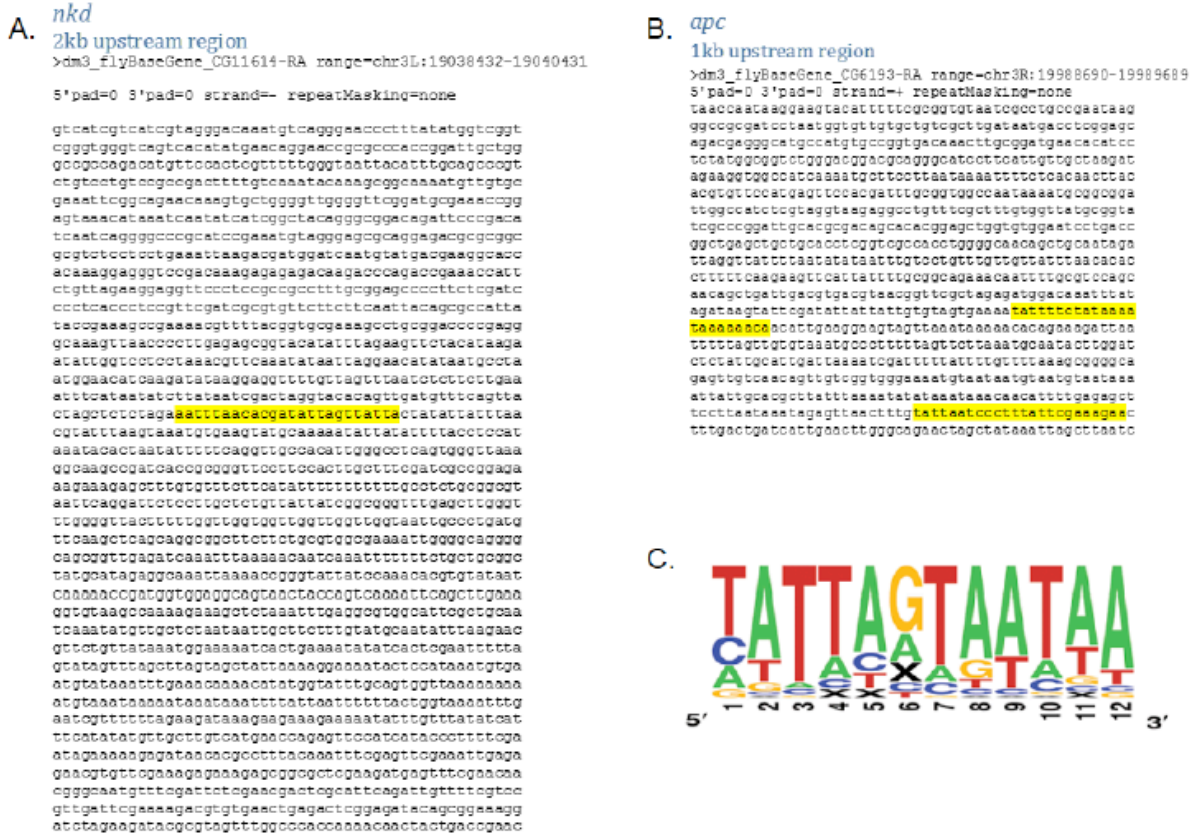

**Figure S2: SATB1-binding sites are present upstream to the TSS of *naked cuticle (nkd)* and *apc-2*.** The sequences upstream sequences of *naked cuticle* and *apc-2* genes were analyzed for the presence of consensus SATB1 binding sites (CSBS) by motif search analysis using MEME. CSBS (C) was identified in the region upstream to the TSS of *nkd* (A) and *apc-2* (B) genes (highlighted in yellow). The upstream regulatory region of *apc-2* gene shows presence of two CSBS sites (B). Hence, mammalian SATB1 can potentially bind these sequences *in vivo*.

**Supplementary Figure S3**

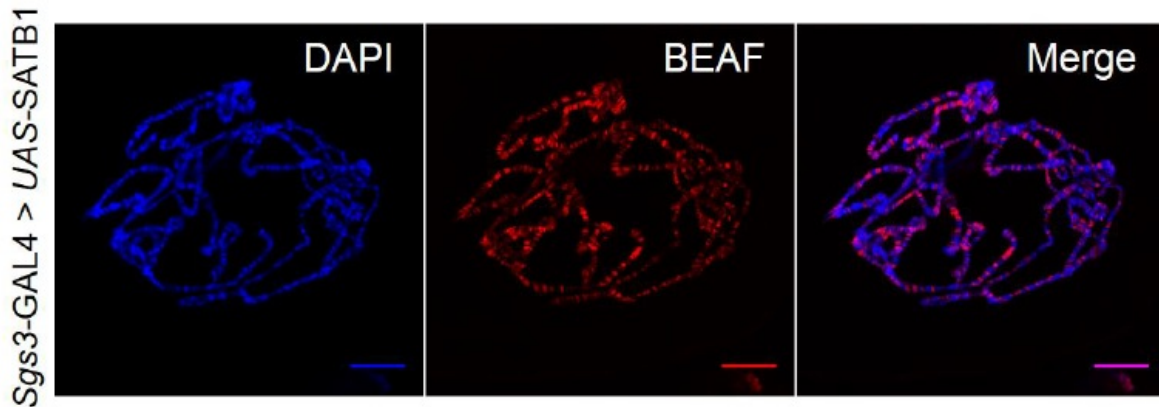

**Figure S3: Immunostaining of polytene chromosomes for *Drosophila* matrix binding protein BEAF.** Polytene chromosome spreads were prepared from salivary glands of third instar larvae expressing human SATB1 under the control of *Sgs3-GAL4* as described in 'Methods'. Antibody for BEAF, a boundary associated MAR-binding protein was used as a positive control for polytene immunostaining depicted in Figure 6. Image was acquired at 63X magnification; the scale bar represents 20  $\mu$ m.

## Supplementary Figure S4

| Chromosome | start    | stop     | score | p-value  | q-value | matched sequence | Gene                                                    | Function                     |
|------------|----------|----------|-------|----------|---------|------------------|---------------------------------------------------------|------------------------------|
| chr2L      | 2446260  | 2446274  | 20.3  | 1.13E-07 | 0.778   | CCAATTAGTAATAAA  | Decapentaplegic                                         | Development                  |
| chr3R      | 10583595 | 10583581 | 21.9  | 3.69E-08 | 0.604   | CCAATTACTAATAAC  | Homothorax                                              | Development                  |
| chr2L      | 8437902  | 8437888  | 20.3  | 1.15E-07 | 0.778   | CCTATTGTAATCAC   | Chrac-14                                                | Chromatin remodeling         |
| chr3R      | 17507940 | 17507954 | 21    | 6.65E-08 | 0.618   | CCAATTGTAATAAC   | Down syndrome cell adhesion molecule 3                  | Cell adhesion                |
| chr2L      | 12649645 | 12649631 | 22.6  | 1.64E-08 | 0.648   | CCTATTAGTAATAAA  | RNA and export factor binding protein 2 ( <i>ref2</i> ) | RNA Export                   |
| chr2R      | 9115437  | 9115451  | 21.6  | 4.71E-08 | 0.574   | CTAATTAGTAATAAC  | Phosphorylated adaptor for RNA export ( <i>phax</i> )   | RNA Export                   |
| chr3L      | 5707345  | 5707359  | 22    | 2.83E-08 | 0.596   | CCTATTTGTAATAAC  | Still life ( <i>sif</i> )                               | Cytoskeletal organization    |
| chr3R      | 355583   | 355597   | 20.9  | 7.34E-08 | 0.618   | CCTATAACTAATAAC  | Myosin 81F                                              | Motor activity               |
| chr3R      | 25675306 | 25675320 | 20.7  | 8.42E-08 | 0.618   | CCTATTGTAATAAA   | Igr3                                                    | GPCR pathway                 |
| chr2L      | 2132094  | 2132080  | 20.6  | 9.99E-08 | 0.778   | CTTACTACTAAAAAC  | Glycogen phosphorylase ( <i>glyP</i> )                  | Glycogen catabolic process   |
| chr3R      | 26417202 | 26417188 | 21.6  | 4.71E-08 | 0.604   | CTTTTAGTAATAAC   | CG5432                                                  | Glycolysis                   |
| chr3R      | 17425231 | 17425245 | 22.6  | 1.64E-08 | 0.42    | CCTATTAGTAATAAA  | CG5873                                                  | Response to oxidative stress |
| chr2R      | 14095239 | 14095225 | 19.7  | 1.74E-07 | 0.902   | CCAATTTGTAATAAC  | Prosap                                                  | Scaffold protein (PSD)       |
| chr2R      | 15176434 | 15176420 | 20.3  | 1.13E-07 | 0.902   | CCTTTTAGTAATAAA  | igloo ( <i>igl</i> )                                    | Neuronal phosphoprotein      |
| chr3L      | 15855480 | 15855466 | 20.7  | 8.42E-08 | 0.806   | CTTATTTGTAATAAC  | pHCl                                                    | Chloride channel             |
| chr3R      | 22847768 | 22847782 | 22.6  | 1.64E-08 | 0.42    | CCTATTAGTAATAAA  | CG4704                                                  | Unknown                      |
| chr2R      | 19690061 | 19690047 | 19.7  | 1.74E-07 | 0.902   | CCAATTTGTAATAAC  | CG15126                                                 | Unknown                      |
| chr2L      | 15360959 | 15360945 | 20.3  | 1.13E-07 | 0.778   | CCTTTTAGTAATAAA  | CG15258                                                 | Unknown                      |

**Figure S4: List of putative SATB1-binding sites in *Drosophila* genome.** Motif search using MEME analysis identified 21 putative consensus SATB1 binding sites (CSBS) in flies. These sites were highly significant and spread across chromosomes 2 and 3. These binding sites were present in genes involved in varied functions such as chromatin remodeling, metabolic and developmental pathways. Three out of these 21 binding sites are depicted in Figure S2.
